# Supplementary material for: Leveraging host-genetics and gut microbiota to determine immunocompetence in pigs
Source: PubMed Central journal article supplement (PMC8543910; doi:10.1186/s42523-021-00138-9), 2021-10-24

**Supplementary figure S1.** Iris-plot representing the 20 most abundant genera. Each bar represents a sample, and bar colors represented the genera relative abundance.

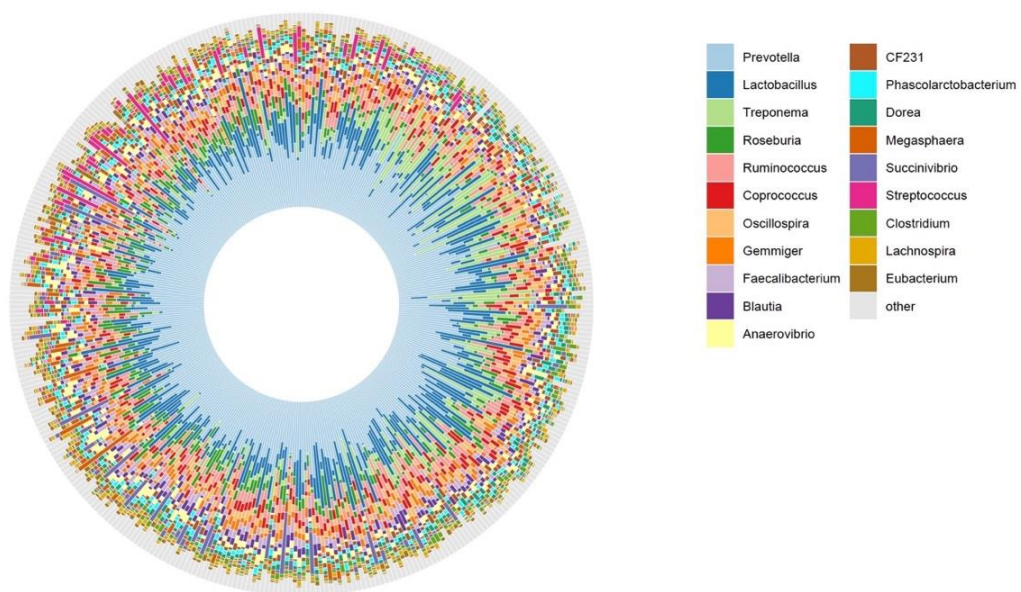

Supplement: 42523_2021_138_MOESM1_ESM.pdf [file 42523_2021_138_MOESM1_ESM.pdf]
